# Supplementary material for: Stratification bias in low signal microarray studies
Source: PubMed Central journal article supplement (PMC2211509; doi:10.1186/1471-2105-8-326), 2007-09-02
Supplement: 1471-2105-8-326-S1.pdf [file 1471-2105-8-326-S1.pdf]

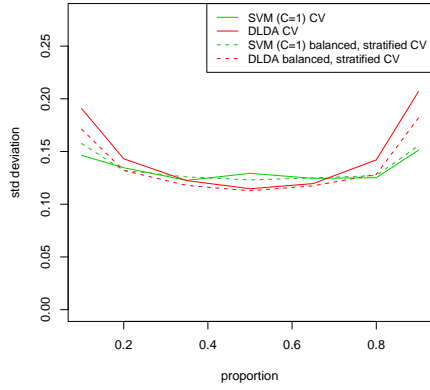

(a) standard CV, BSCV

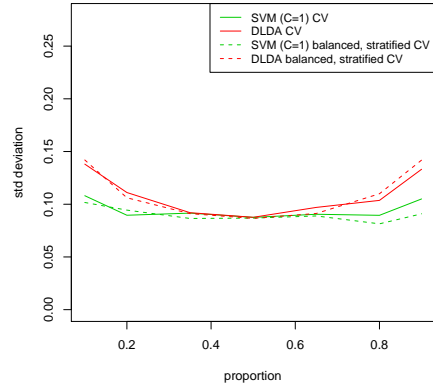

(b) 10-times repeated CV, BSCV

Figure 1: Standard deviations of single runs of two induction algorithms for standard BSCV and CV and 10-times repeated BSCV and CV.

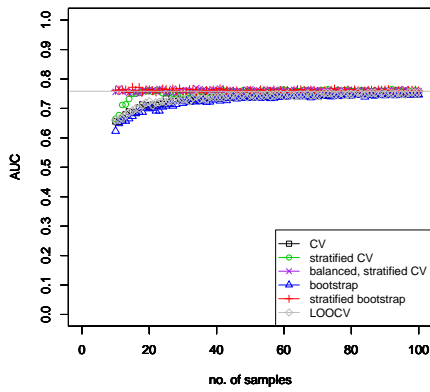

(a)  $d'=1$

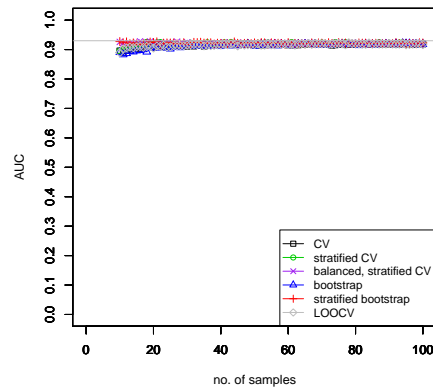

(b)  $d'=2$

Figure 2: Simulated classification results using DLDA (using known mean and variance) with varying separation of the means.

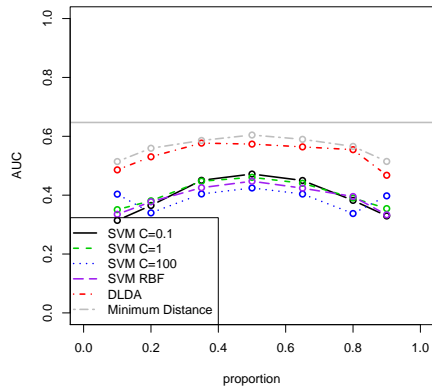

(a) CV

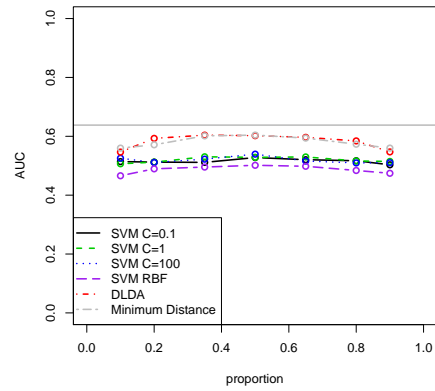

(b) balanced, stratified CV

Figure 3: Simulated classification results for various induction algorithms. The two classes have a multivariate Gaussian distribution (10 dimensions). The discriminability  $d'$  is 0.5 and the data set contains 50 elements.
